# Supplementary material for: Essential Factors Enhancing Industrialized Building Implementation in Malaysian Residential Projects
Source: MDPI journal article supplement (doi:10.3390/su141811711), 2022-09-18
Supplement: s1 [file s1]

# Essential Factors Enhancing Industrialized Buildings Implementation in Malaysian Residential Projects

This supplementary information includes a table of the experts background and profiles who participated in the interview.

**Table S1.** The profile of 15 professionals interviewed.

| <b>Nature of Work</b>     | <b>No. of Respondents</b> | <b>Education</b>  | <b>No. of Respondents</b> | <b>Working Experience</b> | <b>No. of Respondents</b> | <b>Position</b>   | <b>No. of Respondents</b> |
|---------------------------|---------------------------|-------------------|---------------------------|---------------------------|---------------------------|-------------------|---------------------------|
| Academic                  | 3                         | PhD               | 4                         | Less than 5 years         | 1                         | Lecturer          | 3                         |
| Developer & manufacturer  | 1                         | Master            | 3                         | 5 to 10 years             | 5                         | Managing director | 7                         |
| Manufacturer & contractor | 5                         | Bachelor's degree | 7                         | 11 to 20 years            | 7                         | Design manager    | 4                         |
| Consultant                | 2                         | Diploma           | 1                         | More than 20 years        | 2                         | Site Engineer     | 1                         |
| Government official       | 4                         |                   |                           |                           |                           |                   |                           |
